# Supplementary material
Source: Research Square preprint supplement (doi:10.21203/rs.3.rs-8994848/v1)
Supplement: Supplementary file 1 [file 34708b2323afe7a3374debf3.docx]

Attached list 1 List of q-PCR primer sequences

| Number | PRIMER_ID | PRIMER_LEFT_SEQUENCE | PRIMER_RIGHT_SEQUENCE |
| --- | --- | --- | --- |
| 1 | LOC110890275 | 5' CAGCCCATAAAGCAACC 3' | 5' ACATTCTTAGCACCCTTTT 3' |
| 2 | LOC110897460 | 5' CTTCTTCGCCATCTTT 3' | 5' TGCATCACAACCGTTA 3' |
| 3 | LOC110899290 | 5' ATATGAATAGTGGGAGTG 3' | 5' TAATGTTAGAAGCAAGC 3' |
| 4 | LOC110902006 | 5' GGTAATGATAGGGAAGCT 3' | 5' CTTGTCATGGGCAGTTA 3' |
| 5 | LOC110926364 | 5' ATGGGAAGTTGATCTTGA 3' | 5' ATTCGTTGCCAAGATTG 3' |
| 6 | LOC110943318 | 5' ATTGACCGGCTAAGAA 3' | 5' CGGGGCTCTTCTTTC 3' |
